# Supplementary material
Source: HighWire-hosted journal article supplement (https://bmjopen.bmj.com/content/8/7/e021631)
Supplement: inline-supplementary-material-1 [file inline-supplementary-material-1.pdf]

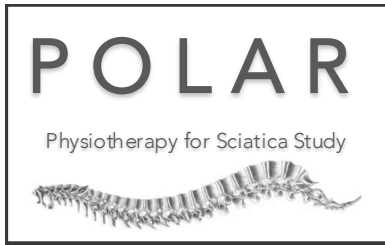

## PhysiOtherapy Management of LumbAr Radicular Syndrome

### Does Early Intervention Improve Outcomes Patient Recruitment Flow

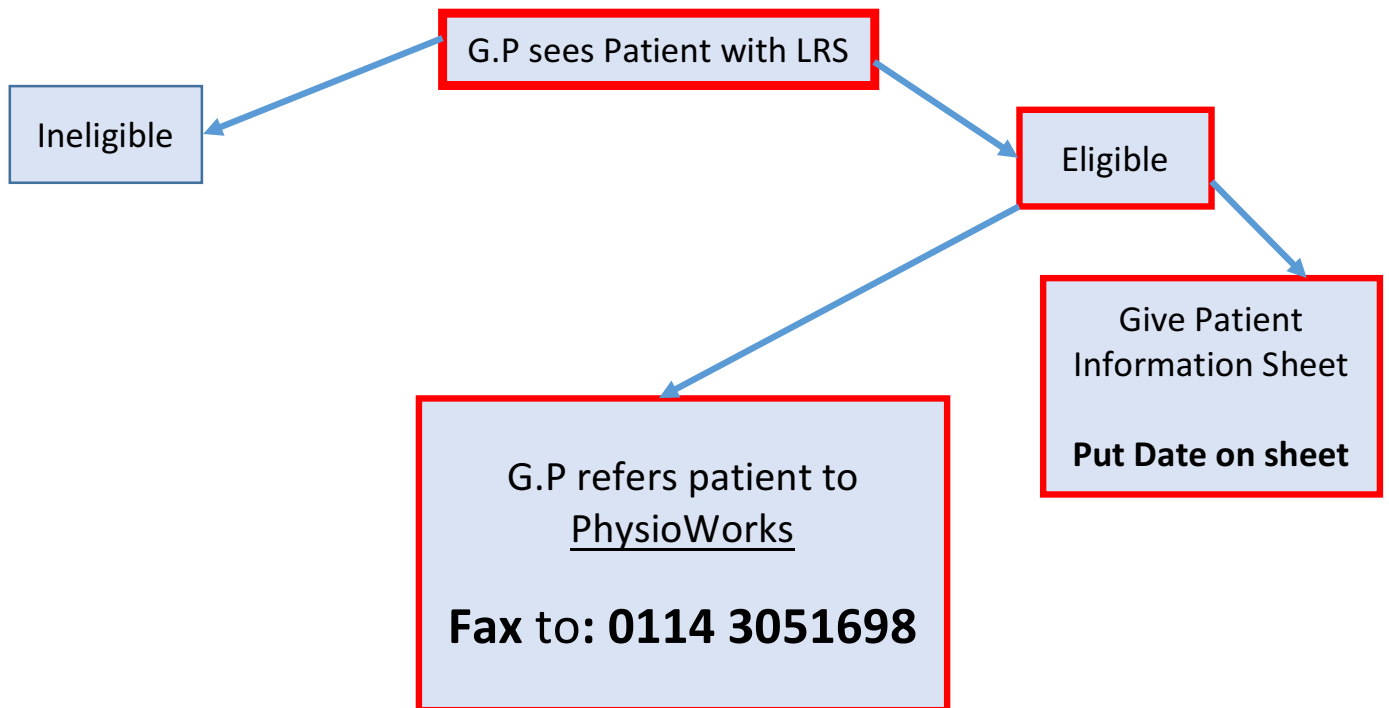

### Eligibility Criteria

Must be & have:

1. Unilateral symptoms of **sciatica** or **femoral** radicular pain  
(See over for definitions)

### Exclusion Criteria

Must **not** have:

1. 'Red flag' signs or symptoms
2. Cancer at the time of the study
3. Proven vascular claudication
4. Bilateral signs/symptoms
5. Spinal fracture within the last 3 months
6. Poor English skills (necessitating the use of an interpreter)

### Characteristics of Sciatica (L4,5,S1,S2)

- Pain and/or paraesthesia and/or numbness in a L4-S2 dermatomal distribution.
- Symptoms usually buttock, posterior or lateral thigh and anterior/posterior/lateral leg.
- Shooting, burning or lancinating type pain.
- Symptoms extend below the knee.

### Characteristics of Femoral radicular pain (L1,2,3)

- Anterior/Antero-lateral thigh pain and/or paraesthesia and/or numbness in L1-3 dermatomal distribution.
- Shooting, burning or lancinating type pain.
- Symptoms extend above or to the knee, not below the knee.

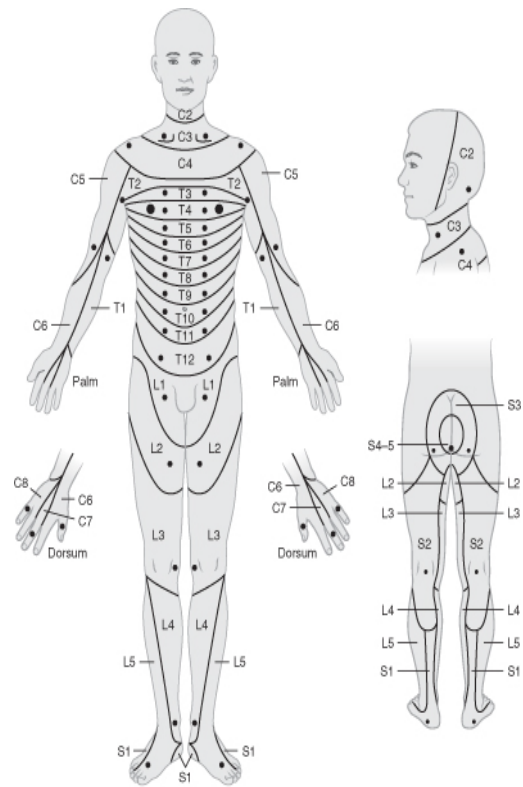

### Red Flag Signs and Symptoms

Red flag signs or symptoms are those which arouse suspicion of potential serious or life-threatening pathology. There are hundreds of red flags in the literature, most of which of spurious validity. However a few useful ones in relation to low back pain and sciatica are:

- Previous cancer
- Systemically unwell (? Potential discitis)
- Spinal deformity (? fracture)
- Significant, unexplained weight loss
- Severe, unremitting pain
- I.V drug use (infection-?discitis)
- Cauda equina syndrome
- Upper motor neurone signs or symptoms (loss of dexterity, worsening balance, gait disturbance, falls, positive UMN tests-hyperreflexia, positive Romberg sign, positive Hoffman sign, muscular hypertonicity etc)

This list is of course not exhaustive and serves only to highlight those patients who require further investigation rather than physiotherapy.
